# Supplementary material for: High-purity monomer recovery from commercial engineering plastics by vacuum pyrolysis depolymerization
Source: Royal Society of Chemistry journal article supplement (doi:10.1039/d4su00614c), 2024-01-01

Electronic Supplementary Information (ESI)

## **High-purity monomer recovery from commercial engineering plastics by vacuum pyrolysis depolymerization**

Eri Yoshida

*Department of Applied Chemistry and Life Science, Toyohashi University of Technology  
1-1 Hibarigaoka, Tempaku-cho, Toyohashi 441-8580, Japan*

E-mail: yoshida.eri.gu@tut.jp

### **Content:**

#### 1. Experimental

- 1-1. Vacuum pyrolysis of PS beads
- 1-2. Vacuum pyrolysis of AS resin dripper in the presence of MS-4A
- 1-3. Vacuum pyrolysis of ABS resin rod in the presence of MS-4A

#### 2. Figures

- Fig. S1: Photo images of PMMA sheet, PS beads, AS resin dripper and ABS resin rod used in this study.
- Fig. S2:  $^1\text{H}$  NMR spectrum of PMMA sheet.
- Fig. S3:  $^1\text{H}$  NMR spectrum of AS resin dripper.
- Fig. S4: A schematic image for the vacuum pyrolysis.

## 1. Experimental

### 1-1. Vacuum pyrolysis of PS beads

PS beads (0.306 g) were placed in a 100-mL Pyrex test tube and heated under vacuum for 20 min using a spirit lamp flame. A liquid product (0.209 g) was collected in the trap. The product was purged with nitrogen, allowed to return to room temperature, and then subjected to GC and  $^1\text{H}$  NMR analysis to determine its purity and composition. The residue (0.083 g) remained in the tube.

### 1-2. Vacuum pyrolysis of AS resin dripper

Small pieces (1.232 g) of the AS resin dripper, which had been crushed, were placed in a 100-mL Pyrex test tube and heated under vacuum for 20 min using a spirit lamp flame. A liquid product (0.396 g) was collected in the trap. The product was purged with nitrogen, allowed to return to room temperature, and then subjected to GC and  $^1\text{H}$  NMR analysis to determine its purity and composition. The residue (0.606 g) remained in the tube.

### 1-3. Vacuum pyrolysis of ABS resin rod

The ABS resin rod was cut into small pieces (1.423 g), each approximately 5 mm in length, placed in a 100-mL Pyrex test tube, and heated under vacuum for 20 min using a spirit lamp flame. A liquid product (0.407 g) was collected in the trap. The product was purged with nitrogen, allowed to return to room temperature, and then subjected to GC and  $^1\text{H}$  NMR analysis to determine its purity and composition. The residue (0.524 g) remained in the tube.

## 2. Figures

Fig. S1. Photographic images of the PMMA sheet, PS beads, AS resin dripper and ABS resin rod used in this study.

**PMMA sheet**

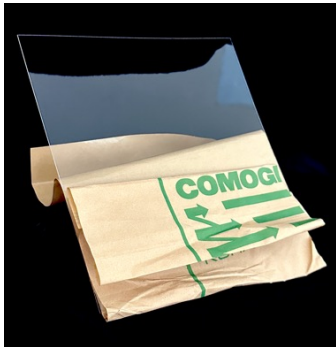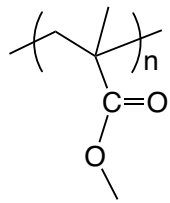

**PS beads**

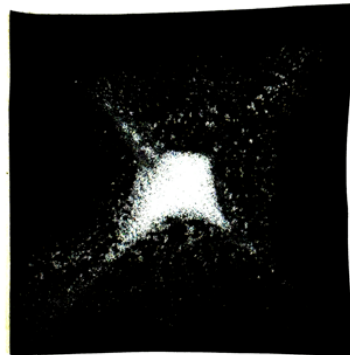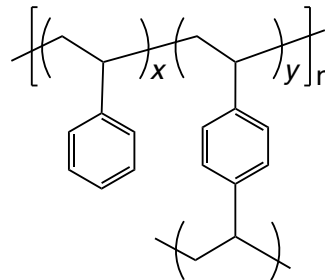

$$x/y = 0.990/0.010$$

**AS resin dripper**

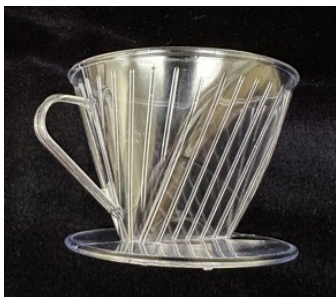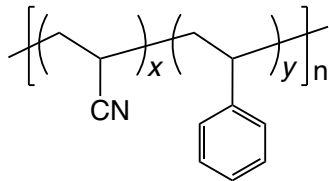

$$x/y = 0.354/0.646$$

**ABS resin rod**

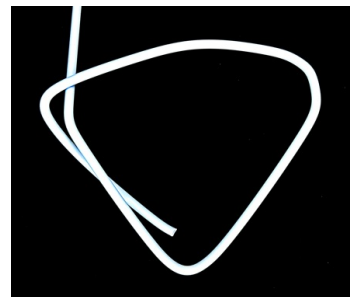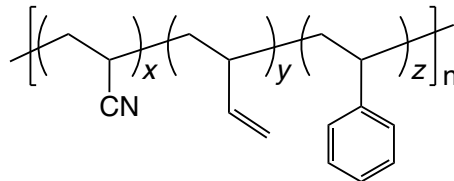

$$x/y/z = 0.253/0.383/0.364$$

Fig. S2.  $^1\text{H}$  NMR spectrum of the PMMA sheet. Solvent:  $\text{CDCl}_3$

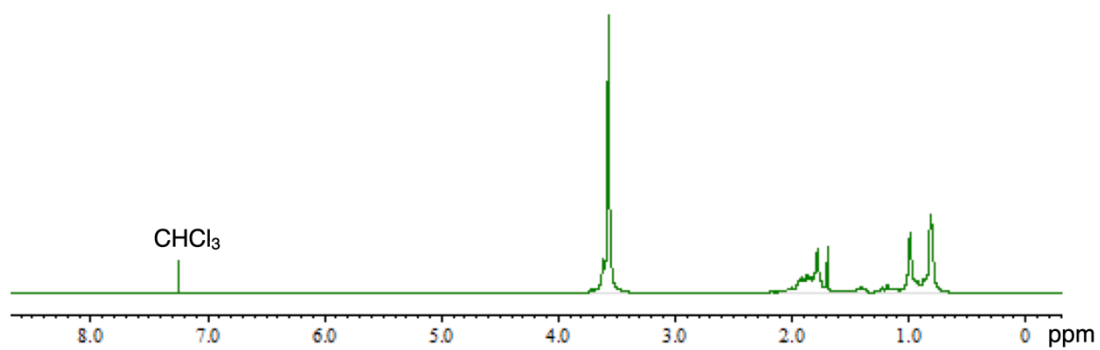

Fig. S3.  $^1\text{H}$  NMR spectrum of the AS resin dripper. Solvent:  $\text{DMSO}-d_6$ . \*Indicates impurity in  $\text{DMSO}-d_6$ .

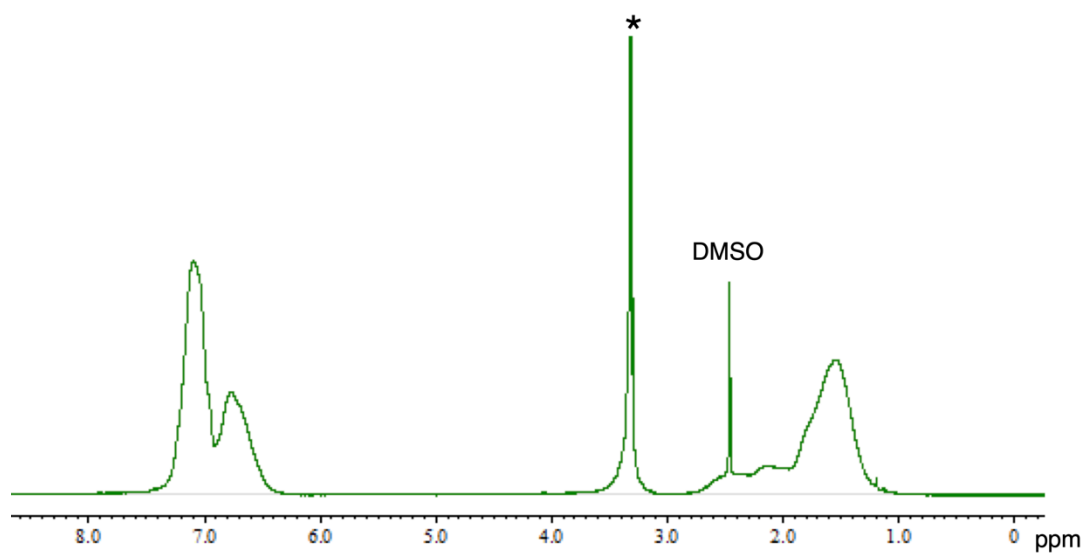

Fig. S4. Schematic illustration of the vacuum pyrolysis process.

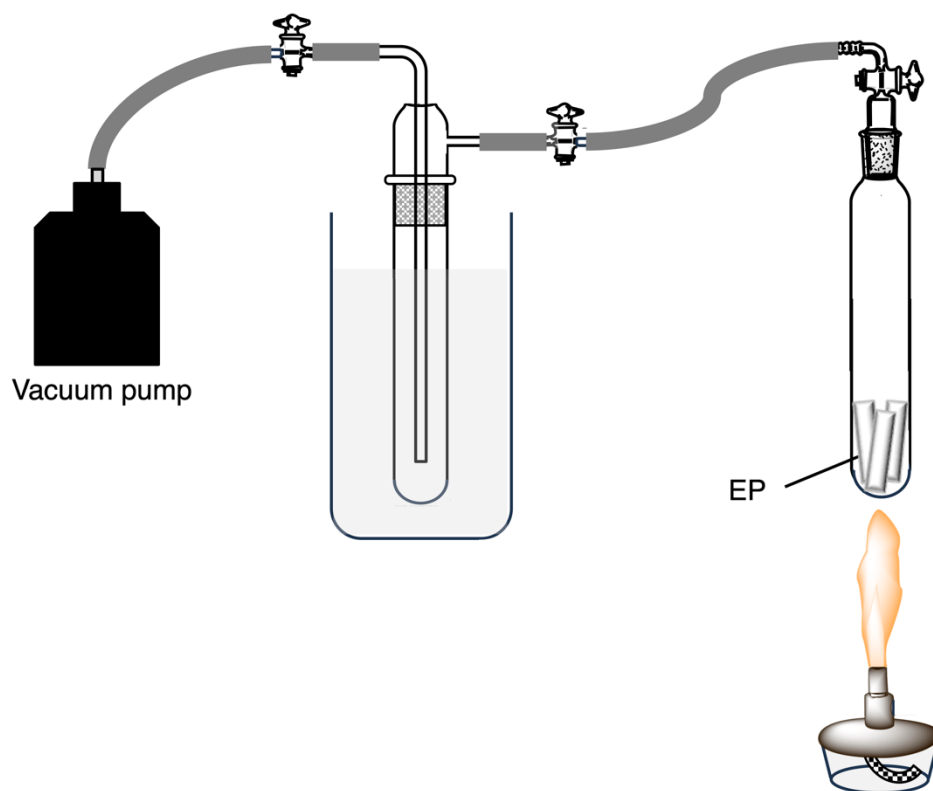

Supplement: d4su00614c1.pdf [file d4su00614c1.pdf]
